# Supplementary material
Source: PubMed Central journal article supplement (PMC2268601)

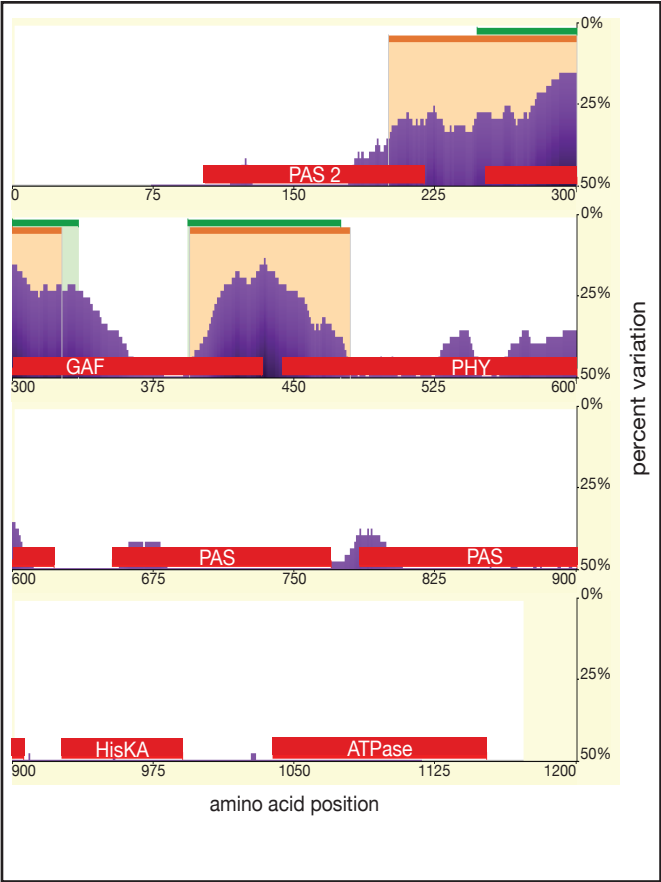

Supplement: pnas_0712174105_1.pdf [file pnas_0712174105_1.pdf]
